# Supplementary material for: A boron-decorated melon-based carbon nitride as a metal-free photocatalyst for N2 fixation: a DFT study
Source: Royal Society of Chemistry journal article supplement (doi:10.1039/d0cp03824e), 2020-01-01
Supplement: d0cp03824e1.pdf [file d0cp03824e1.pdf]

## Supporting Information

### **A Boron-decorated Melon-based Carbon Nitride as a Metal-free Photocatalyst for N<sub>2</sub> Fixation: a DFT Study**

Mei Zheng,<sup>†</sup> Yi Li,<sup>†,‡</sup> Kaining Ding,<sup>†</sup> Yongfan Zhang,<sup>†,‡</sup> Wenkai Chen,<sup>†,‡</sup> Wei Lin<sup>\*,†,‡</sup>

<sup>†</sup>State Key Laboratory of Photocatalysis on Energy and Environment, College of Chemistry, Fuzhou University, Fuzhou 350108, P.R. China

<sup>‡</sup> Fujian Provincial Key Laboratory of Theoretical and Computational Chemistry, Xiamen, Fujian 361005, China

**Corresponding authors:** wlin@fzu.edu.cn.

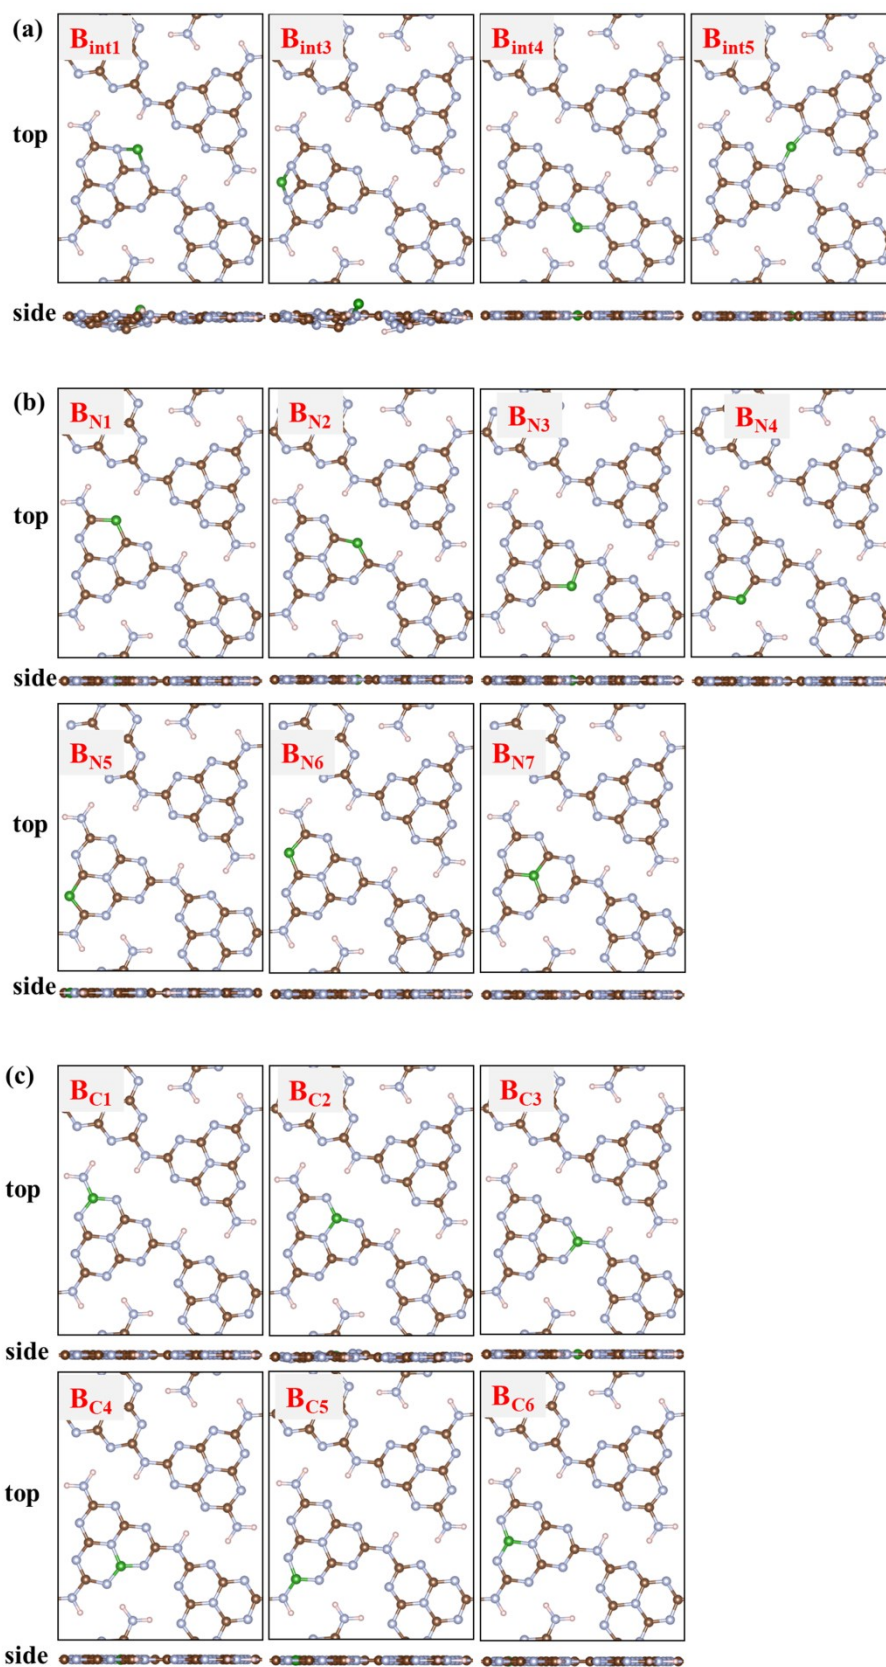

**Fig. S1** The top and side views of optimized structures of B-decorated melon-based CNs with (a)  $B_{int}$ , (b)  $B_N$ , and (c)  $B_C$  configurations.

**Table S1** Binding energy ( $E_b$ ) and formation energies ( $E_{\text{form}}$ ) of B-decorated melon-based CNs with  $B_{\text{int}}$ ,  $B_{\text{N}}$  and  $B_{\text{C}}$ , in which  $B_{\text{int}}$  represents a B atom adsorption on melon-based CN, while the  $B_{\text{N}}$  and  $B_{\text{C}}$  are doping of single B atom to N and C atom respectively.

|                        |                   |                   |                   |                   |                 |                 |                 |
|------------------------|-------------------|-------------------|-------------------|-------------------|-----------------|-----------------|-----------------|
|                        | $B_{\text{int}1}$ | $B_{\text{int}3}$ | $B_{\text{int}4}$ | $B_{\text{int}5}$ |                 |                 |                 |
| $E_b$ (eV)             | -1.93             | -1.92             | -3.42             | -2.96             |                 |                 |                 |
|                        | $B_{\text{N}1}$   | $B_{\text{N}2}$   | $B_{\text{N}3}$   | $B_{\text{N}4}$   | $B_{\text{N}5}$ | $B_{\text{N}6}$ | $B_{\text{N}7}$ |
| $E_{\text{form}}$ (eV) | 1.92              | 1.31              | 0.52              | 2.23              | 0.97            | 2.21            | 1.63            |
|                        | $B_{\text{C}1}$   | $B_{\text{C}2}$   | $B_{\text{C}3}$   | $B_{\text{C}4}$   | $B_{\text{C}5}$ | $B_{\text{C}6}$ |                 |
| $E_{\text{form}}$ (eV) | 1.62              | 0.96              | 0.70              | 0.74              | 0.83            | 1.04            |                 |

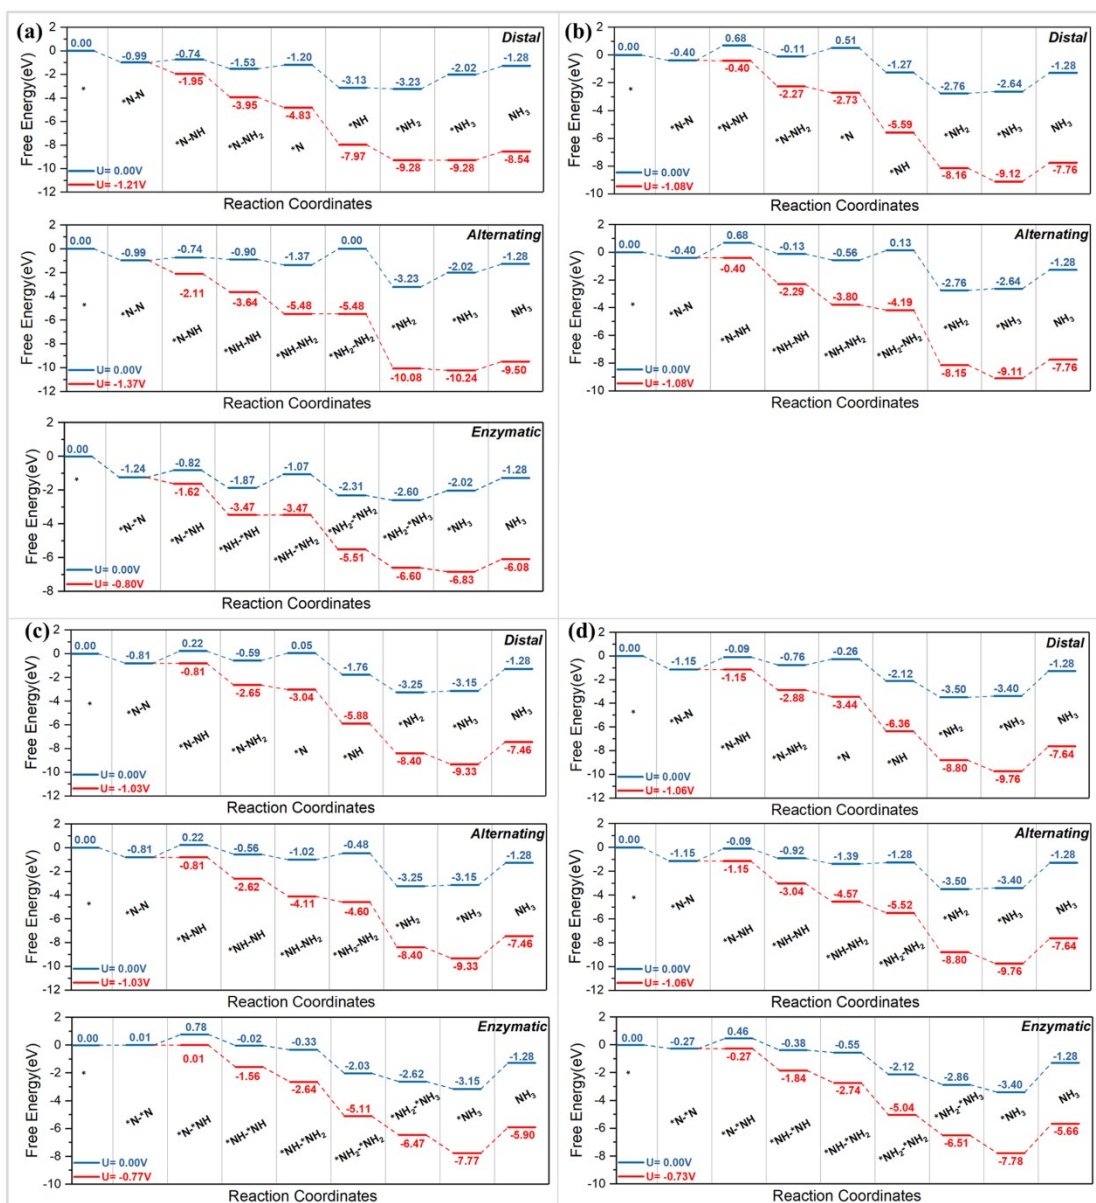

**Fig. S2** Free energy diagrams for  $N_2$  reduction through distal, alternating and enzymatic mechanisms on the (a)  $B_{int5}$ , (b)  $B_{N3}$ , (c)  $B_{N5}$  and (d)  $B_{N2}$ .

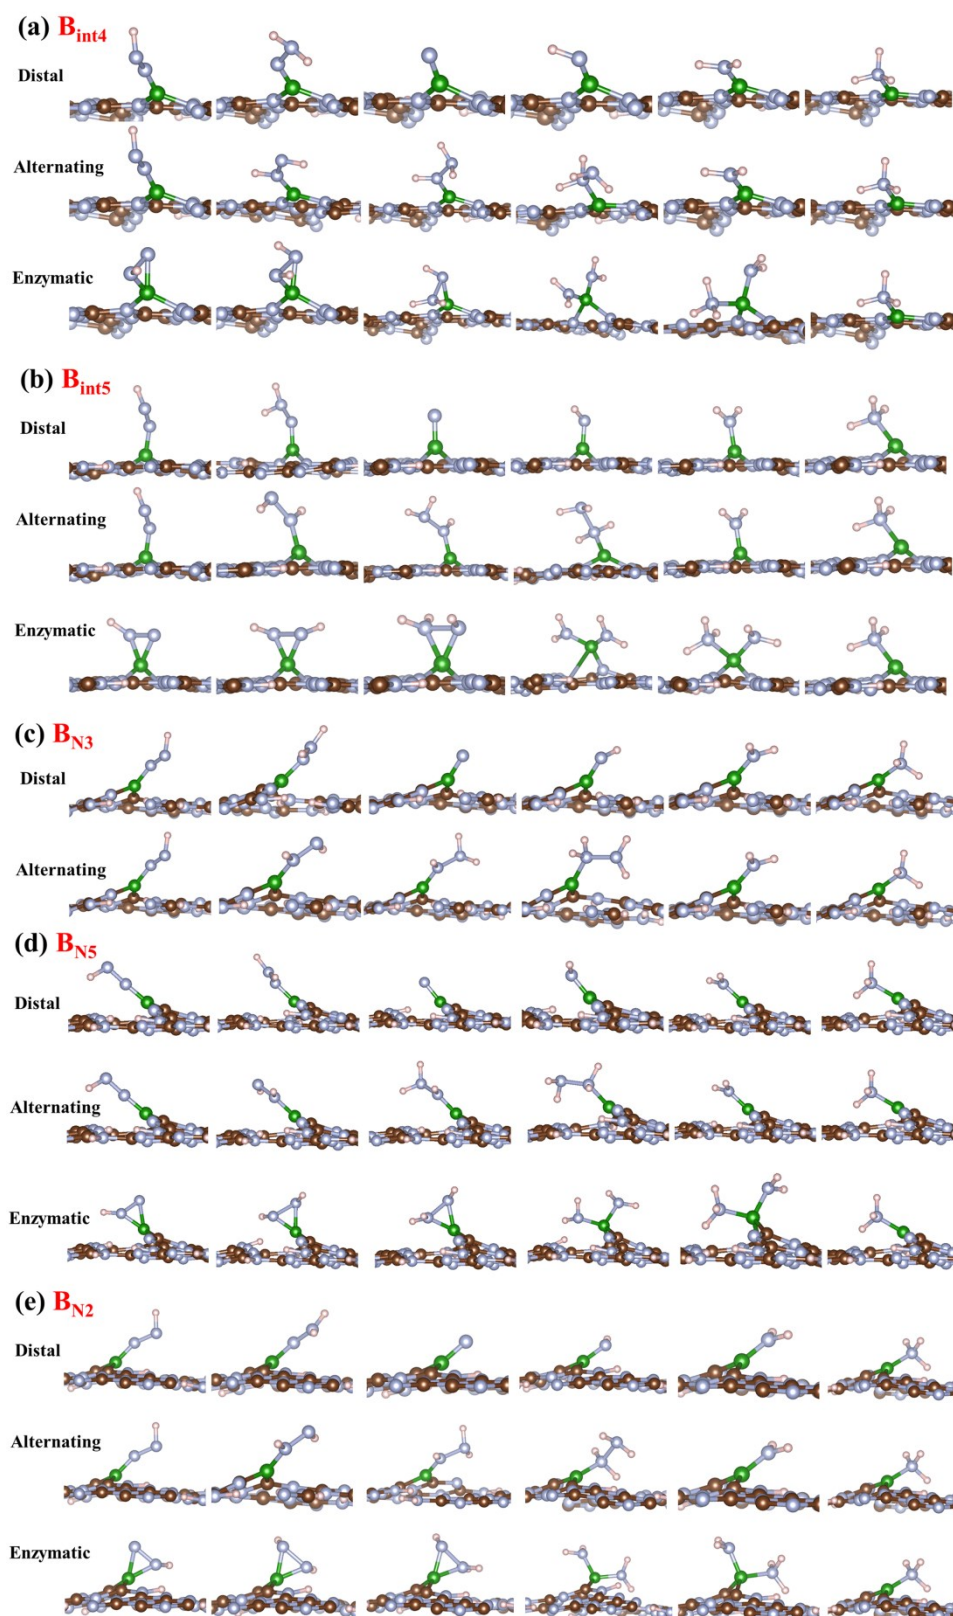

**Fig. S3** The various intermediates for  $N_2$  reduction through distal, alternating and enzymatic mechanisms on the (a)  $B_{int4}$ , (b)  $B_{int5}$ , (c)  $B_{N3}$ , (d)  $B_{N5}$  and (e)  $B_{N2}$ .

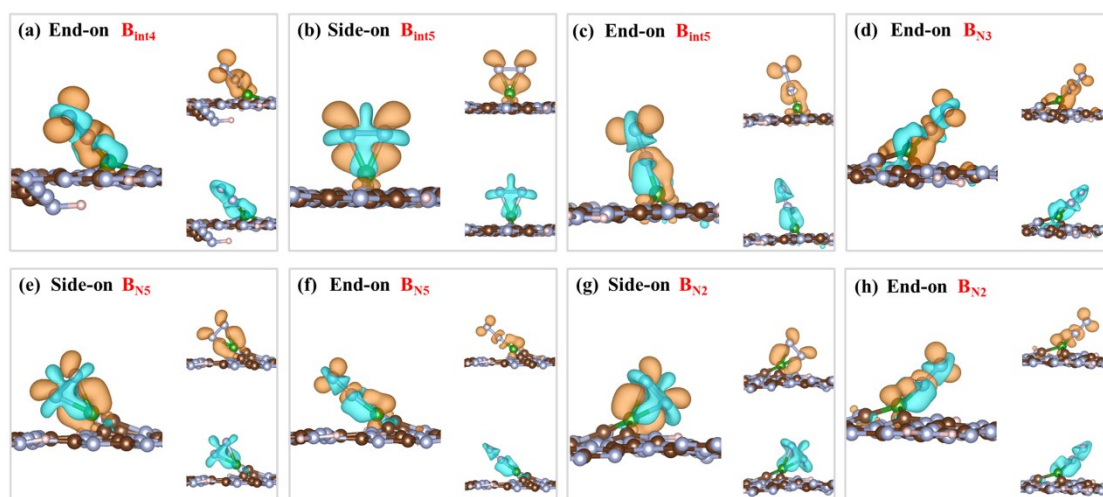

**Fig. S4** The charge difference density of adsorbed  $N_2$  on (a)  $B_{int4}$  through the end-on pattern, (b-c)  $B_{int5}$  through side-on and end-on patterns, (d)  $B_{N3}$  through the end-on pattern, (e-f)  $B_{N5}$  and (g-h)  $B_{N2}$  through the side-on and end-on patterns, respectively. The isosurface value is set to be  $0.005 e/\text{\AA}^3$ . The orange and cyan regions represent charge accumulation and depletion, respectively.

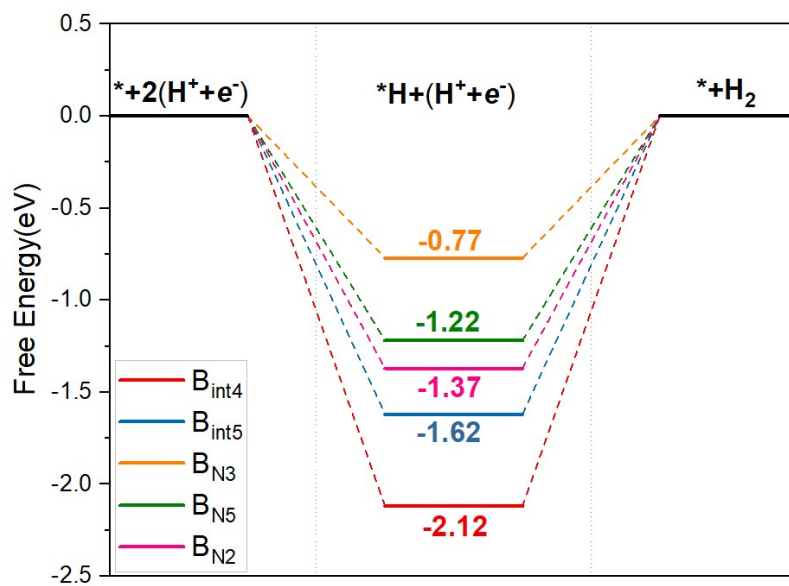

**Fig. S5** Free energy diagrams of HER on  $B_{\text{int}4}$ ,  $B_{\text{int}5}$ ,  $B_{\text{N}3}$ ,  $B_{\text{N}5}$  and  $B_{\text{N}2}$ .

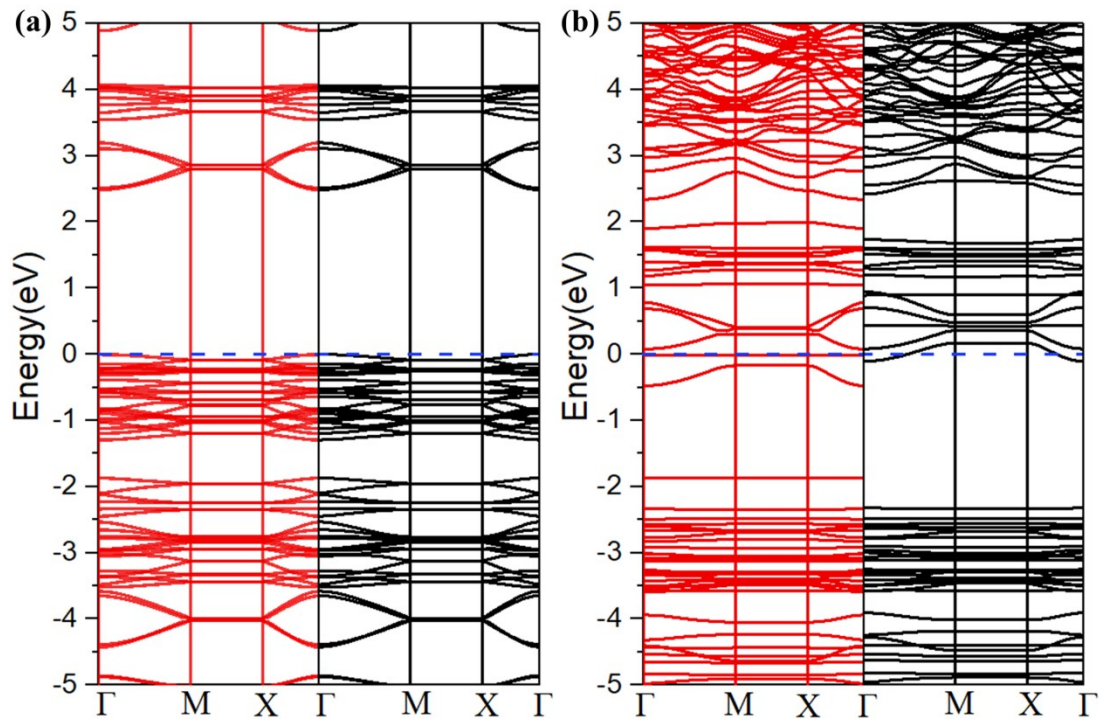

**Fig. S6** The computed band structures of (a) pure melon-based CN and (b)  $B_{int4}$ . The Fermi level is set as zero in dotted lines.



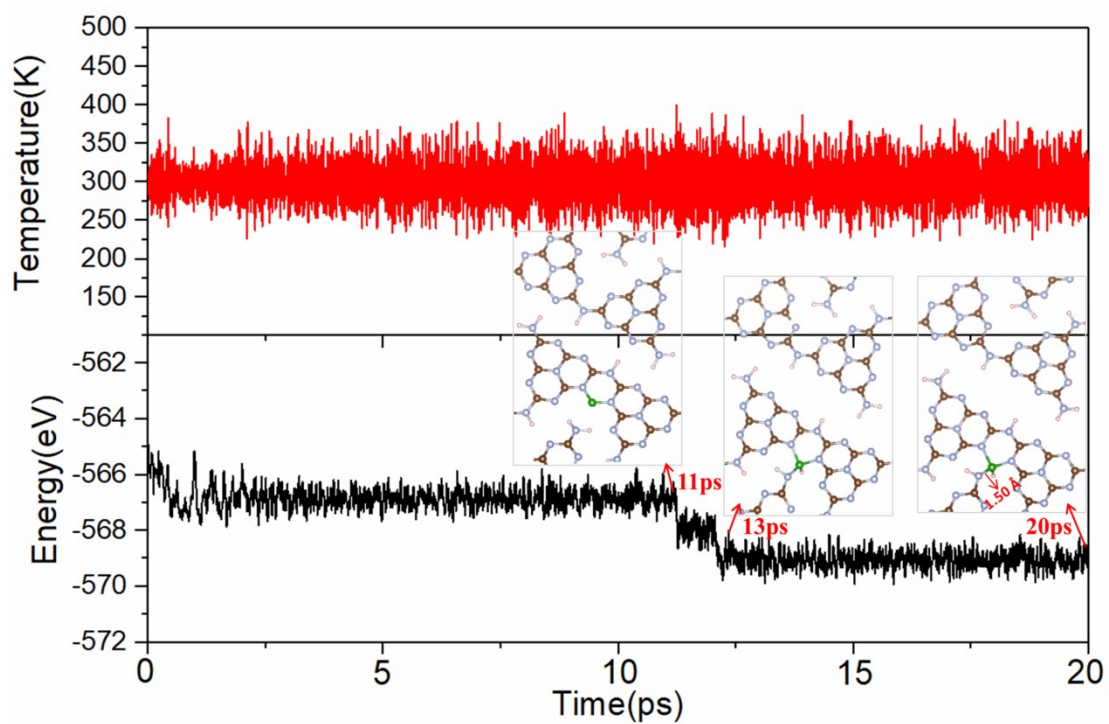

**Fig. S7** (a) Variations of energy against the time for AIMD simulation of B<sub>int4</sub>; the simulation is run under 300 K for 20 ps with a time step of 0.5 fs. (b) The structure of B<sub>int4</sub> in the dynamic simulation process at about 11, 13 and 20 ps.
